# Supplementary material for: Molecular design of a highly matched and bonded interface achieves enhanced thermal boundary conductance
Source: Royal Society of Chemistry journal article supplement (doi:10.1039/d3nr00627a), 2023-01-01
Supplement: d3nr00627a1.pdf [file d3nr00627a1.pdf]

## **Molecular Design for Highly Matched and Bonded Interface Achieves Enhanced Thermal Boundary Conductance**

Shuting Wang<sup>a</sup>, LinLin Ren<sup>a</sup>, Meng Han<sup>a</sup>, Wei Zhou<sup>a</sup>, Zhenyu Wang<sup>a</sup>, Xue Bai<sup>a</sup>, Rong Sun<sup>a</sup>, and Xiaoliang Zeng<sup>a,\*</sup>

<sup>a</sup>Shenzhen Institute of Advanced Electronic Materials, Shenzhen Institute of Advanced Technology, Chinese Academy of Sciences, Shenzhen 518055, China

\* Corresponding author.

*E-mail addresses:* [xl.zeng@siat.ac.cn](mailto:xl.zeng@siat.ac.cn) (X Zeng)

---

## 1. Experimental Section

### 1.1. Materials

Adipic dihydrazide (AD, 99%), isophorone diisocyanate (IPDI, mixture of isomers, 99%), allyl glycol (usafdo-47, 98%), ditin butyl dilaurate (T12, 95%), N, N-dimethylbenzylamine (99%) diiodomethane (98%), ethylene glycol (GC, 99.9%) and polymethyl methacrylate ether solution (6%) were purchased from Aladdin (China). N, N-dimethylacetamide (DMAc, 99.8%) was purchased from energy chemical (China). Thioctic acid (TA, 99%) and methylhexahydrophthalic anhydride were purchased from Shanghai Maclin Biochemical Technology Co., LTD. CYD-128 was purchased from China Petroleum & Chemical Corporation. Sylgard<sup>TM</sup> 184 silicone elastomer kit was purchased from dow chemical company. All the starting reagents and solvents used in the syntheses were used without further purification.

### 1.2. Synthesis

#### 1) Synthesis of the PU-TA elastomers

The typical synthetic routes for the PU-TA polymers are shown in Figure S1 and described in detail as follows. A three-neck round bottom flask equipped with a mechanical stirrer was charged with 0.025 mol AD, 30 ml DMAc, 0.0774g T12, and 0.05 mol IPDI, followed by heating at 70 °C and stirring for 2 h to obtain adipic dihydrazide-isophorone diisocyanate (AD-NCO). Next, 0.05 mol usafdo-47 and 20 ml DMAc were simultaneously added into the AD-NCO, followed by heating at 70 °C and stirring for 2 h to obtain adipic dihydrazide-isophorone diisocyanate-allyl glycol (AD-NCO-AG). Another single-neck round bottom flask equipped with a mechanical stirrer was charged with TA (0.0242 mol), followed by heating at 160 °C for 10 min. When the TA was melted, AD-NCO-AG (0.0484 mmol for PU-TA@500-1; 0.0605 mmol for PU-TA@400-1; 0.08067 mmol for PU-TA@300-1; 0.121 mmol for PU-TA@200-1; 0.242 mmol for PU-TA@100-1; 1.613 mmol for PU-TA@15-1), a certain amount of T12 remained in the AD-NCO-AG and DMAc (10 ml) were added into the flask. The reaction system was further kept at 160 °C for 20 min. The as-obtained polymer solutions were poured into Teflon template and then heated in oven at 80 °C for 12 h, finally a series of different crosslinking PU-TA was obtained. When the theoretical mole ratio of TA and prepolymer was 500:1, PU-TA was marked as PU-TA@500-1. Naming method of PU-TA@400-1, PU-TA@300-1, PU-TA@200-1, PU-TA@100-1 and PU-TA@15-1 was the same as the method as above.

#### 2) Synthesis of the PU-TA thermal interface

Physical vapor deposition (PVD) technology was employed to deposit aluminum (Al) layer on the surface of quartz glass surface with a thickness of 200 microns. Al was grown as thin layers ( $46 \pm 1$  nm) on the surface of quartz glass by magnetron sputtering (PRO line PVD 75; Kurt J. Lesker Company, Jefferson Hills, PA, USA) at room temperature (Figure S4). In each experiment, a vacuum of about  $1 \times 10^{-6}$  mTorr must be reached before argon was injected into the chamber. The obtained thickness of Al grew out at PVD 75 for 150 s at the power of 500 W. Polymethyl methacrylate (PMMA) ether solution will be used to form a protective layer on the surface of the Al layer to prevent metal oxidation. PMMA can be removed by acetone before next use. PU-TA polymer solutions was deposited on the Al layer via spin-coating method at 400 rpm on Model WS-650MZ-23NPPB. The obtained samples were heated in oven at 80 °C for 12 h, finally a series of different crosslinking PU-TA thermal interface were synthesized.

#### 3) Synthesis of the PDMS and EP and its thermal interface with Al

Sylgard<sup>TM</sup> 184 silicone elastomer kit was spin-coated on Al layer. EP was synthesis by mixing 10 g CYD-128, 1g methylhexahydrophthalic anhydride and 0.055 g N, N-dimethylacetamide, and then spin-coated on Al layer. Both samples were heated in oven at 125 °C for 1 h and 145 °C for 3 h.

## 2. Supplementary Figures and Tables

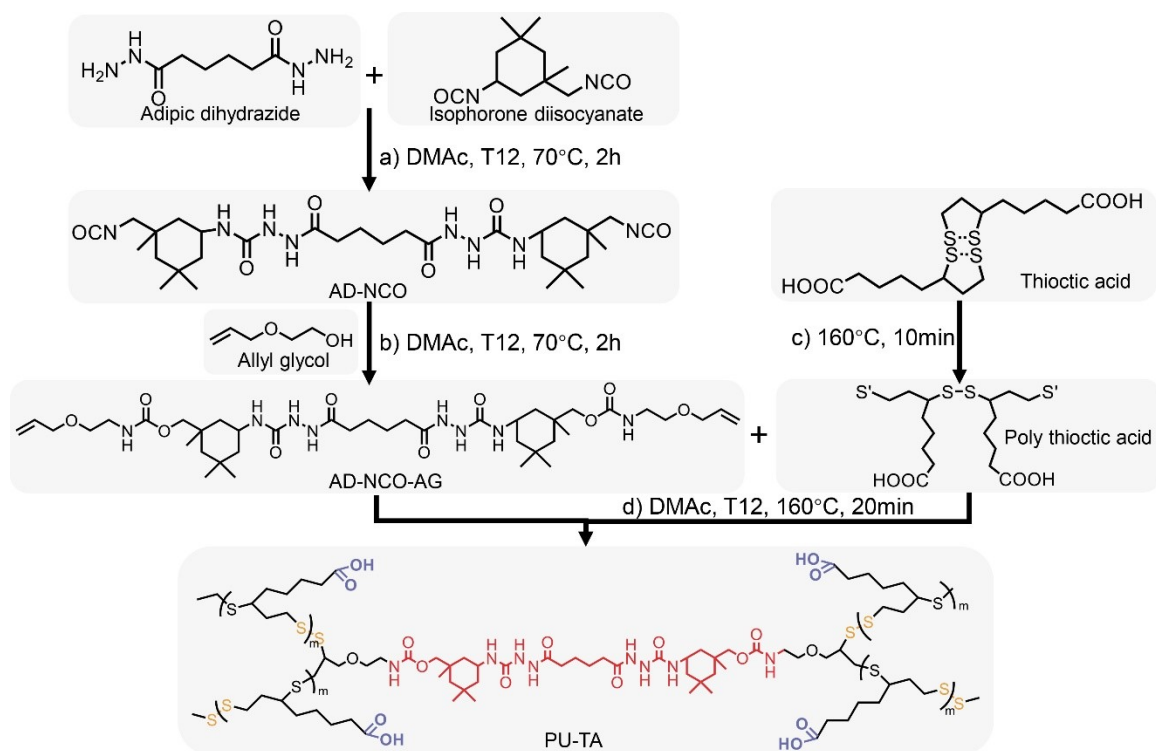

Figure S1. Synthetic routes of the PU-TA polymers.

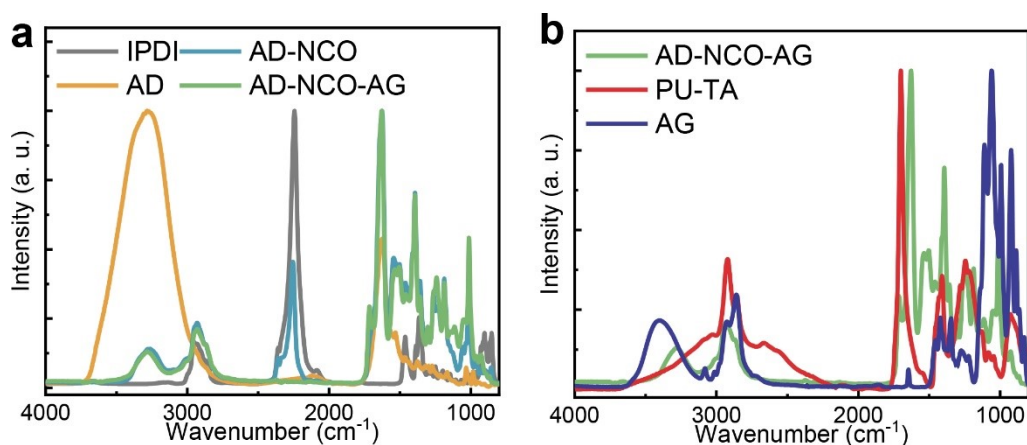

Figure S2. Fourier transform infrared spectrometer (FTIR) spectra of (a) 4000-1000 cm<sup>-1</sup> of IPDI, AD, AD-NCO, and AD-NCO-AG, and (b) 4000-1000 cm<sup>-1</sup> of AD-NCO-AG, PU-TA, and AG.

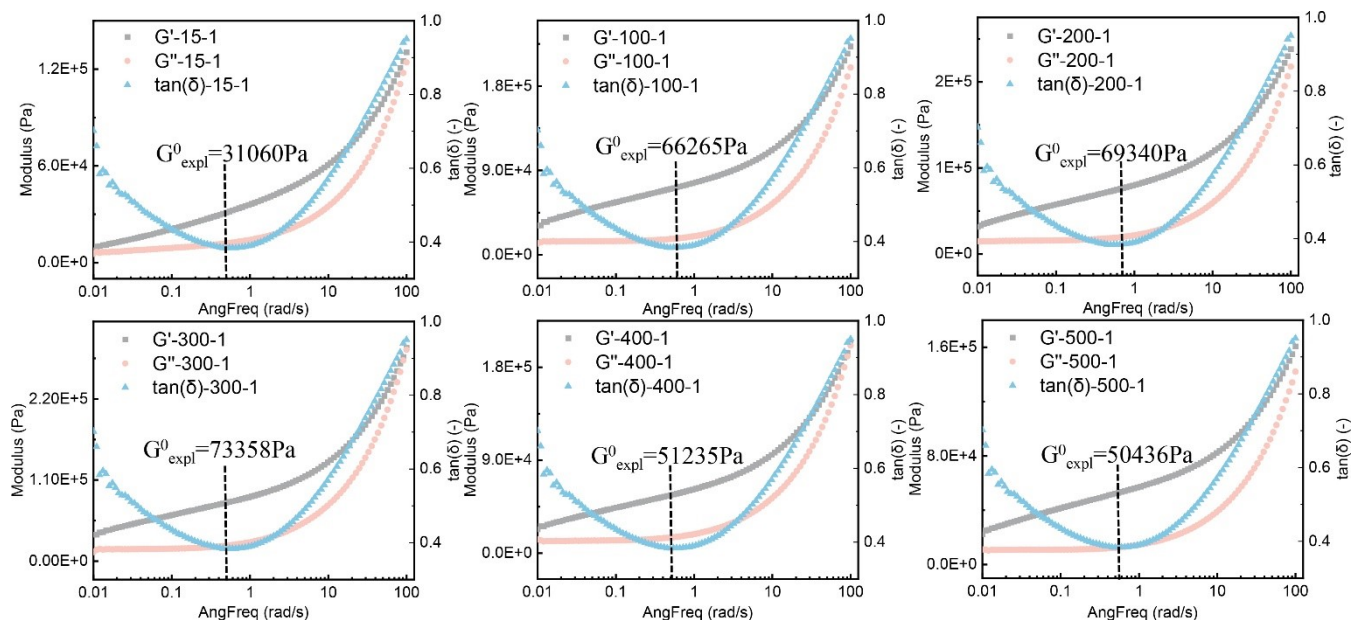

Figure S3. The storage modulus ( $G'$ ), the loss modulus ( $G''$ ) and loss factor ( $\tan(\delta)$ ) of PU-TA with different  $V_e$ . PU-TA@15-1 in figure was abbreviated as 15-1, and others were similar to the above.

The storage modulus ( $G'$ ) in Fig. S3 were larger than the loss modulus ( $G''$ ) indicating that the bulk polymer preferred exhibiting the properties of elastic solids.

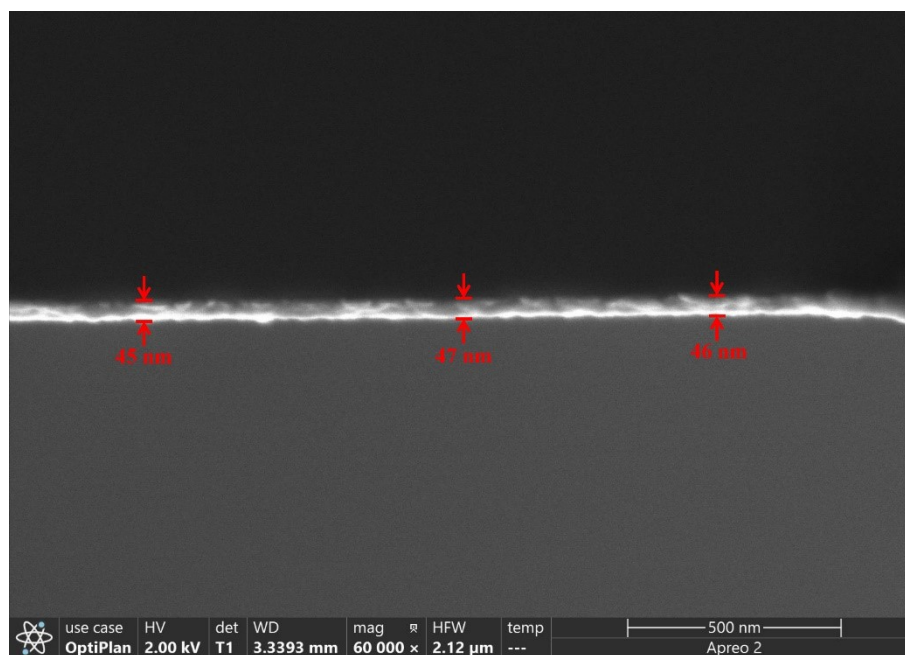

Figure S4. SEM image of the cross section of a substrate (Al/ quartz glass).

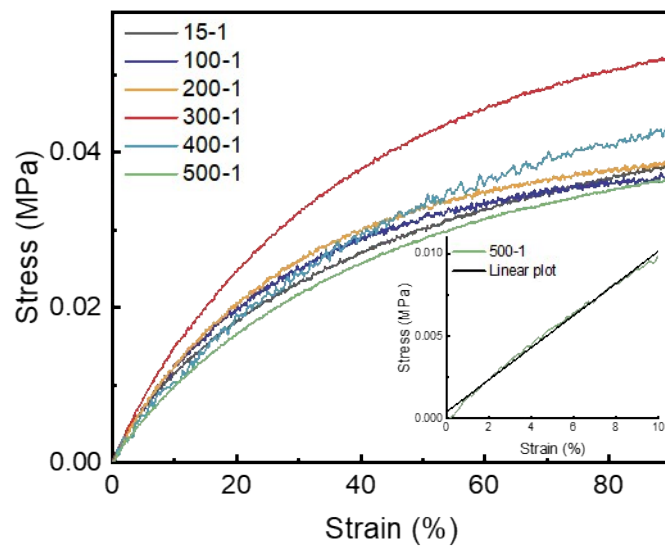

Figure S5. Stress-strain curves about PU-TA with different molar ratio of prepolymer 3 and prepolymer 2.

Figure S6. The schematic diagram of a typical TDTR setup.

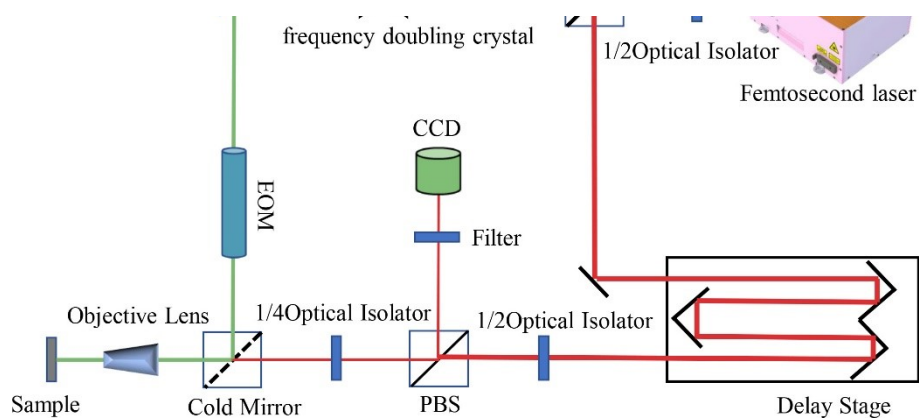

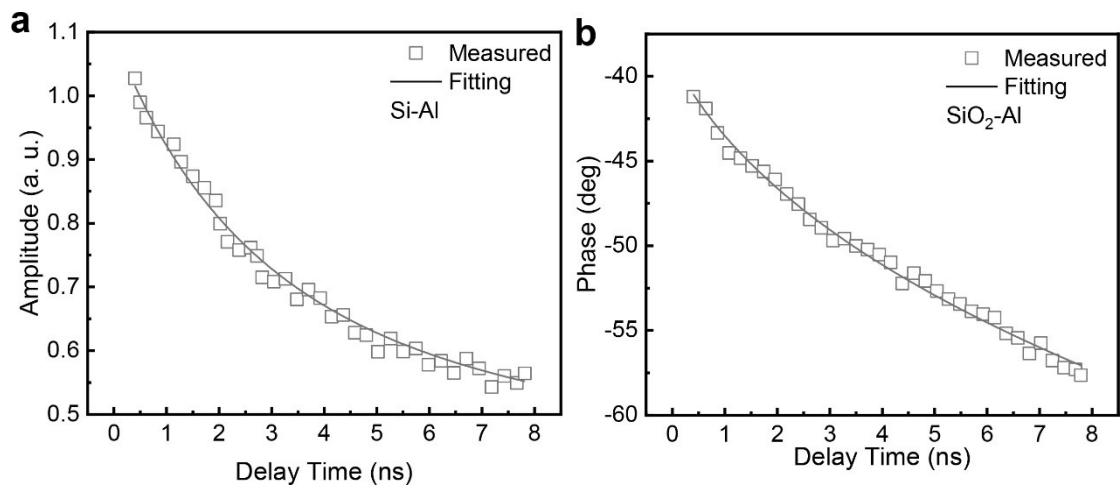

Figure. S7. (a) Measured and fitting curves of Si/Al; (b) Measured and fitting curves of fused silica/Al

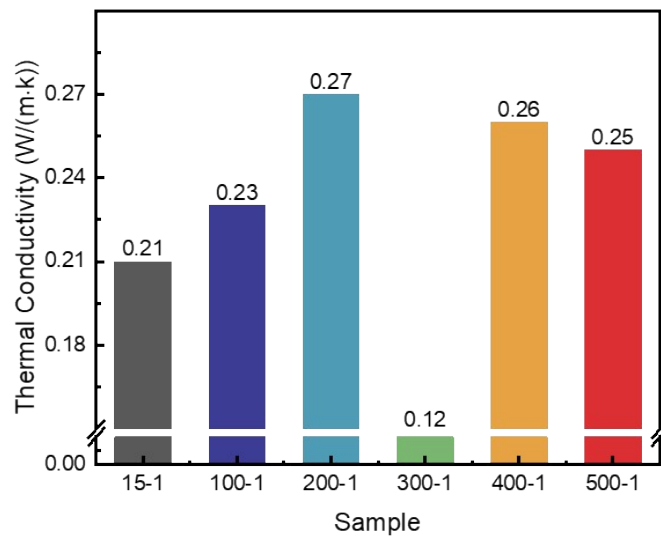

Figure S8. The thermal conductivity of PU-TA with different  $V_e$ .

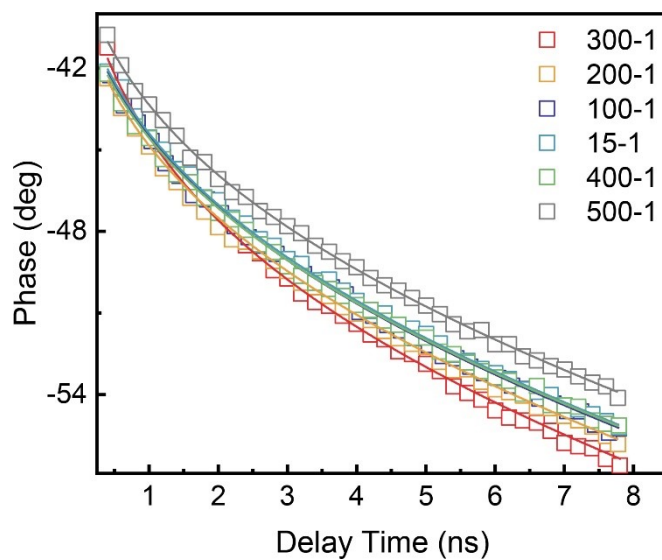

Figure S9. Phase signal and fitting curve of PU-TA with different  $V_e$ .

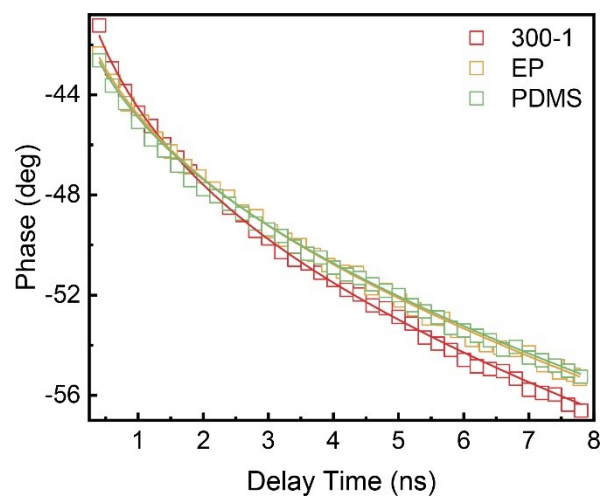

Figure S10. Phase signal and fitting curve of PU-TA@300-1, PDMS and EP.

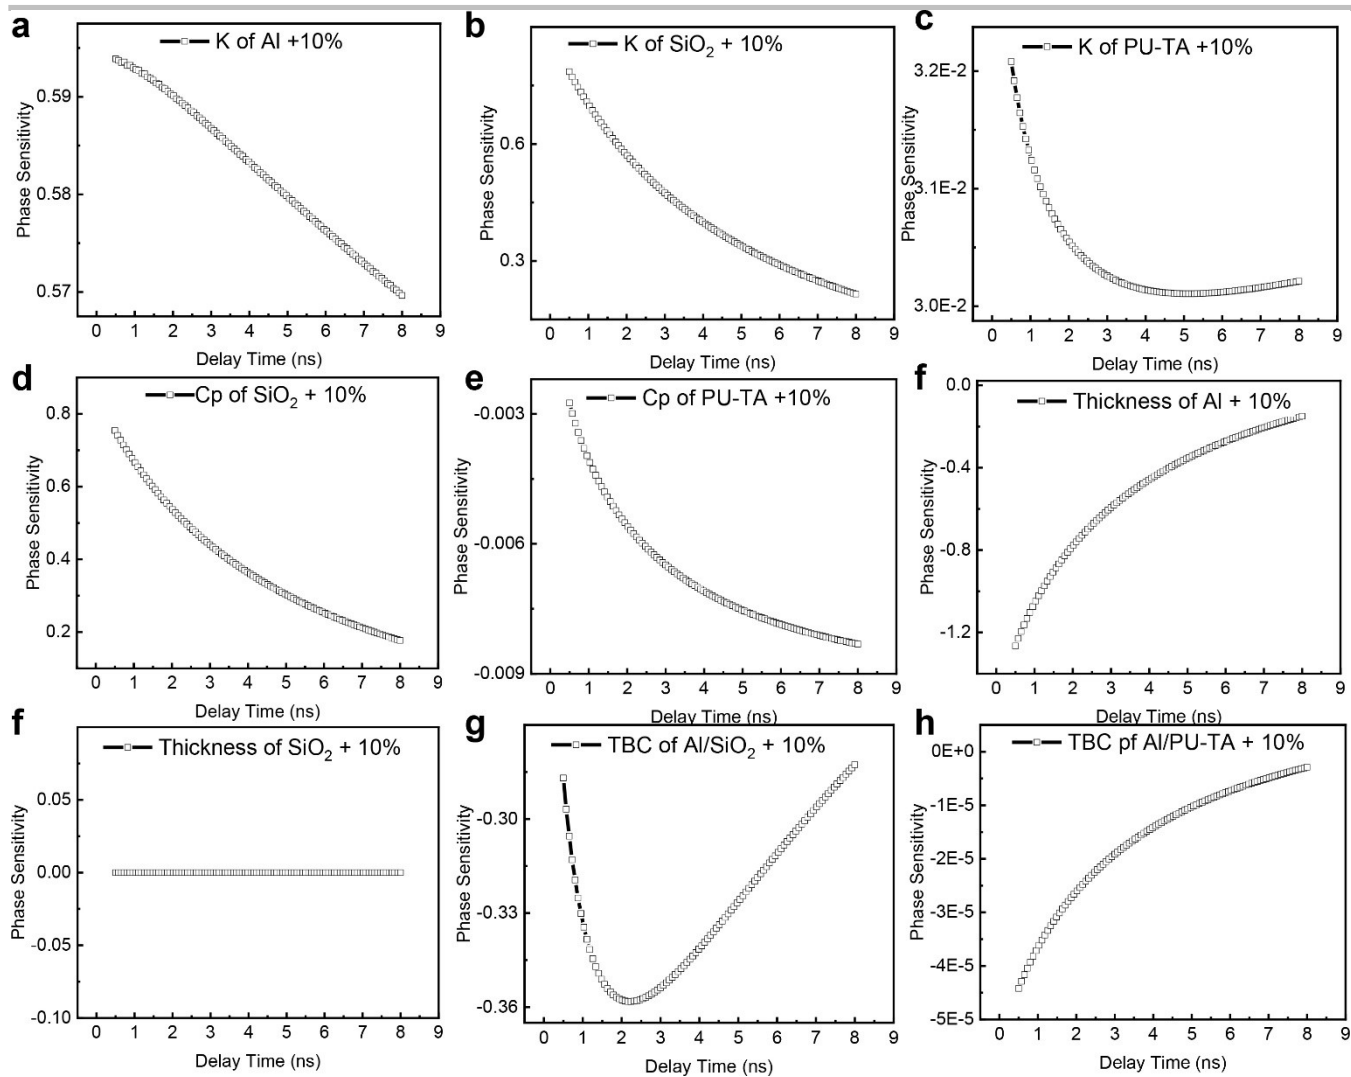

Figure S11. Sensitivity of different parameters. K represents thermal conductivity; Cp represents heat capacity.



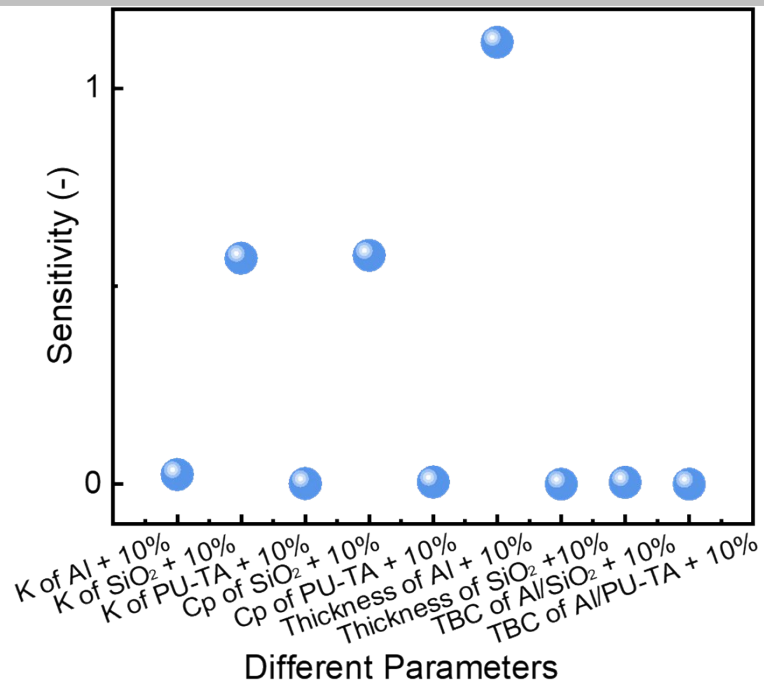

Figure S12. Differences of sensitivity between various factors.

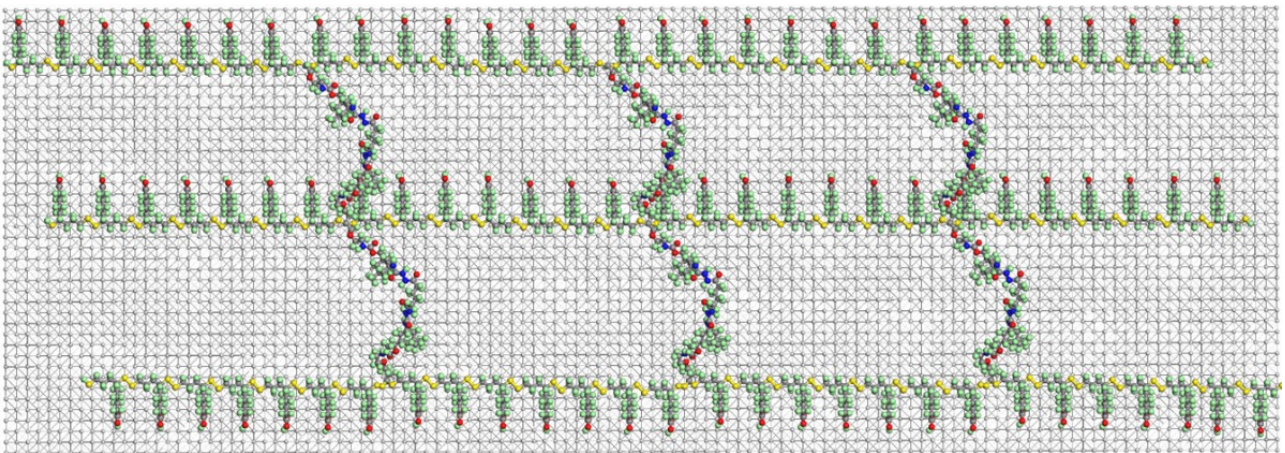

Figure S13. Schematic of PU-TA thermal interface model taking 400-1 as an example.

Table S1. Contact angles tested by three types of probe liquids.

| Contact angles | Diiodomethane | Ethylene glycol | Water |
|----------------|---------------|-----------------|-------|
| Al-1           | 60.3          | 87.2            | 66.3  |

|      |      |      |      |
|------|------|------|------|
| Al-2 | 55.6 | 87.1 | 63.1 |
| Al-3 | 56.0 | 87.5 | 65.7 |
| Al-4 | 56.0 | 86.6 | 64.0 |
| Al-5 | 58.8 | 87.9 | 63.4 |
| Al-6 | 57.3 | 86.9 | 65.7 |

Table S2. Surface energy components of the three probe liquids and the Al layers estimated from the contact angles in Table S5 using equation (4) to (6).

| Material        | $\gamma$ | $\gamma^{LW}$ | $\gamma^{AB}$ | $\gamma^+$     | $\gamma^-$  |
|-----------------|----------|---------------|---------------|----------------|-------------|
| Diiodomethane   | 50.8     | 50.8          | $\approx 0$   | $\approx 0.01$ | $\approx 0$ |
| Ethylene glycol | 48.0     | 29.0          | 19.0          | 3.0            | 30.1        |
| Water           | 72.8     | 21.8          | 51            | 25.5           | 25.5        |
| Al-1            | 25.0     | 25.0          | $\approx 0$   | $\approx 0$    | 89.6        |
| Al-2            | 26.8     | 26.8          | $\approx 0$   | $\approx 0$    | 104.0       |
| Al-3            | 25.3     | 25.3          | $\approx 0$   | $\approx 0$    | 103.4       |
| Al-4            | 26.3     | 26.3          | $\approx 0$   | $\approx 0$    | 101.6       |
| Al-5            | 26.6     | 26.6          | $\approx 0$   | $\approx 0$    | 95.9        |
| Al-6            | 25.3     | 25.3          | $\approx 0$   | $\approx 0$    | 98.1        |

Table S3. Roughness of PU-TA with various Ve

| Samples | Sa(um) | Sz(um) | Str   | Spc     | Sdr      |
|---------|--------|--------|-------|---------|----------|
| 15-1    | 0.349  | 1.736  | 0.368 | 290.905 | 0.000128 |
| 100-1   | 0.343  | 1.954  | 0.471 | 608.054 | 0.000148 |
| 200-1   | 0.341  | 1.616  | 0.305 | 483.874 | 0.000172 |
| 300-1   | 0.336  | 1.514  | 0.305 | 280.195 | 0.000126 |
| 400-1   | 0.335  | 1.502  | 0.327 | 673.061 | 0.000181 |
| 500-1   | 0.337  | 1.425  | 0.302 | 217.408 | 0.000106 |

Table S4. Parameters used in multilayer thermal conduction model

|              | Layer thickness    | Thermal conductivity | Heat capacity                 |
|--------------|--------------------|----------------------|-------------------------------|
| Fused silica | 200 um             | 1.30 W/(m·K)         | 1.63e6 J/(m <sup>3</sup> ·K)  |
| Al           | 46 nm              | 237.00 W/(m·K)       | 2.42e6 J/(m <sup>3</sup> ·K)  |
| PU-TA        | -1 (semi-infinite) | 0.12-0.27 W/(m·K)    | 2.17e6 J/(m <sup>3</sup> ·K)  |
| PDMS         | -1 (semi-infinite) | 0.29 W/(m·K)         | 1.42e3 J/(m <sup>3</sup> ·K)  |
| EP           | -1 (semi-infinite) | 0.26 W/(m·K)         | 1.27 e6 J/(m <sup>3</sup> ·K) |

Table S5. Nodes and monomers in PU-TA with different Ve

| Samples | Nodes | Monomers |
|---------|-------|----------|
| 15-1    | 1     | 11       |
| 100-1   | 12    | 5        |
| 200-1   | 10    | 5        |
| 300-1   | 11    | 5        |
| 400-1   | 6     | 7        |
| 500-1   | 6     | 8        |

Table S6. Energy and distance in lj/cut between different types of atoms

| i-j | $\epsilon_{i-j}/\text{kcal/mol}$ | $\sigma_{i-j}/\text{\AA}$ |
|-----|----------------------------------|---------------------------|
|-----|----------------------------------|---------------------------|

---

---

|      |       |       |
|------|-------|-------|
| Al-C | 0.054 | 4.010 |
| Al-H | 0.020 | 2.995 |
| Al-O | 0.267 | 3.300 |
| Al-N | 0.106 | 4.070 |
| Al-S | 0.071 | 4.027 |

---

---
